# Supplementary material
Source: MDPI journal article supplement (https://www.mdpi.com/2220-9964/8/2/73)
Supplement: s1 [file s1]

Article

# Grassland dynamics and the driving factors based on net primary productivity in Qinghai province, China

Xiaoxu Wei<sup>1,2</sup>, Changzhen Yan<sup>1,\*</sup> and Wei Wei<sup>3</sup>

<sup>1</sup> Key Laboratory of Desert and Desertification, Northwest Institute of Eco-Environment and Resources, Chinese Academy of Sciences, Lanzhou 730000, China; weixiaoxu@lzb.ac.cn

<sup>2</sup> University of Chinese Academy of Sciences, Beijing 100049, China

<sup>3</sup> College of Geographic and Environmental Science, Northwest Normal University, Lanzhou 730070, China; weiweigis2006@126.com

\* Correspondence: yancz@lzb.ac.cn

## Eight equations

### 1 Equations and parameters on CASA model

$$APAR(x, t) = PAR(x, t) \times FPAR(x, t) \quad (1)$$

$$\mathcal{E}(x, t) = T_{\varepsilon}(x, t) \times W_{\varepsilon}(x, t) \times \mathcal{E}_{\max} \quad (2)$$

where  $PAR(x, t)$  stands for the total solar radiation of pixel  $x$  in  $t$  time ( $\text{MJ m}^{-2}$ );  $FPAR$  represents the fraction of absorbed  $PAR$  of pixel  $x$  in  $t$  time;  $T_{\varepsilon}$  and  $W_{\varepsilon}$  stand for the effects from the temperature stress and the moisture stress, respectively;  $\mathcal{E}_{\max}$  is the maximum LUE, which is set as 0.115–0.326 across different grassland types ( $\text{gC/MJ}$ ) [1].

$PAR$  was calculated using the following formula[2]:

$$PAR = \frac{1}{50} \times (D_0 + D_1 L + D_2 E + D_3 V)(a + bS) \quad (3)$$

where  $D_0$ ,  $D_1$ ,  $D_2$ ,  $D_3$ ,  $a$  and  $b$  stand for constants;  $L$  represents the latitude;  $E$  represents elevation (m);  $V$  is the monthly vapor pressure (pa); and  $S$  stands for the proportion of sunshine duration (%).

$FPAR$  can be calculated as follows [3]:

$$FPAR = a \times NDVI + b \quad (4)$$

where  $a = 1.1638$  and  $b = -0.1426$  are empirical parameters.

$T_{\varepsilon}$  is calculated as follows:

$$T_{\varepsilon}(x, t) = T_1(x, t) \times T_2(x, t) \quad (5)$$

$$T_1(x, t) = 0.8 + 0.2 \times T_{opt}(x) - 0.0005 \times [T_{opt}(x)]^2 \quad (6)$$

$$T_2(x, t) = \frac{1.184}{1 + \exp[0.2 \times T_{opt}(x) - 10 - T(x, t)]} \times \frac{1}{1 + \exp[0.3 \times [-T_{opt}(x)] - 10 - T(x, t)]} \quad (7)$$

$T_{opt}$  is the monthly air temperature as the AGB comes up to the peak;  $T_1(x, t)$  and  $T_2(x, t)$  are the temperature stress coefficients, which reflect the reduction in light-use efficiency caused by a temperature factor (Potter et al., 1993).

$W_{\varepsilon}(x, t)$ , stands for monthly water deficit [4], which is determined based on the monthly values of actual evapotranspiration  $E(x, t)$  and potential evapotranspiration  $E_p(x, t)$ , indicating that the reduction in light-use efficiency caused by a moisture factor.

$$W_e(x, t) = 0.5 + 0.5 \times E(x, t) / E_p(x, t) \quad (8)$$

where  $E(x, t)$  (mm) and  $E_p(x, t)$  (mm) are calculated according to the model of regional actual evapotranspiration and the approach of complementary relationship between actual evapotranspiration and potential evapotranspiration [5,6].

## References

1. Cai, Y. Analysis of terrestrial net primary productivity by improved casa model in three-river headwaters region. *J. Nanjing University of Inform. Scie. Technol.* **2013**, *5*, 34–42.
2. Cheng, D.Y. Agricultural climatology. Meteorological Press, Beijing, **1994**, pp. 65–67.
3. Myneni, R.B.; Williams, D.L.; Myneni, R.B.; Williams, D.L. On the relationship between FAPAR and NDVI. *Remote Sens. Environ.* **1994**, *4*, 200–211.
4. Potter, C.S.; Randerson, J.T.; Field, C.B.; Matson, P.A.; Vitousek, P.M.; Mooney, H.A.; et al. Terrestrial ecosystem production: a process model based on global satellite and surface data. *Global Biogeochem. Cy.* **1993**, *7*, 811–841.
5. Zhou, G.; Zhang, S.X. Study on NPP of natural vegetation in china under global climate change. *Acta Phytocologica Sinica*, **1996**, *20*, 11–19. (in Chinese, with English abstract)
6. Boucher, J.; Quilliot, D.; Pradère, J.P.; Simon, M.F.; Grès, S.; Guigné, C.; et al. Potential involvement of adipocyte insulin resistance in obesity-associated up-regulation of adipocyte lysophospholipase D/autotaxin expression. *Diabetologia* **2005**, *48*, 569–577.

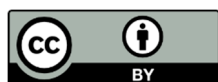

© 2019 by the authors. Licensee MDPI, Basel, Switzerland. This article is an open access article distributed under the terms and conditions of the Creative Commons Attribution (CC BY) license (<http://creativecommons.org/licenses/by/4.0/>).
